# Supplementary material for: Global reach of ageism on older persons’ health: A systematic review
Source: PubMed Central journal article supplement (PMC6961830; doi:10.1371/journal.pone.0220857), 2020-01-15
Supplement: pone.0220857.s004.pdf [file pone.0220857.s004.pdf]

#### S4. Characteristics of 422 Studies of Ageism and Health <sup>a</sup>

|                                                         | Number<br>Of Studies | % of Total<br>Studies |                                                    | Number<br>Of Studies | % of Total<br>Studies |
|---------------------------------------------------------|----------------------|-----------------------|----------------------------------------------------|----------------------|-----------------------|
| <b>STUDY CHARACTERISTICS</b>                            |                      |                       | <b>TARGETS OF AGEISM<sup>e</sup></b>               |                      |                       |
| <b>Continents of studies</b>                            |                      |                       | <b>Average age<sup>f</sup></b>                     |                      |                       |
| Africa                                                  | 1                    | 0.3                   | < 74                                               |                      | 80.8                  |
| Asia                                                    | 28                   | 6.6                   | ≥ 75                                               |                      | 19.2                  |
| Australia/Oceania                                       | 13                   | 3.1                   | <b>Gender</b>                                      |                      |                       |
| Europe                                                  | 129                  | 30.6                  | More men                                           | 94                   | 39.3                  |
| North America                                           | 201                  | 47.6                  | More women                                         | 145                  | 60.7                  |
| South America                                           | 2                    | 0.5                   | <b>Education</b>                                   |                      |                       |
| Global <sup>b</sup>                                     | 49                   | 11.6                  | Majority attended high school or less <sup>g</sup> | 75                   | 71.4                  |
| <b>Development level of study countries<sup>c</sup></b> |                      |                       | Majority attended college or more                  | 30                   | 28.6                  |
| More-developed countries                                | 357                  | 94.0                  | <b>Race/Ethnicity</b>                              |                      |                       |
| Less-developed countries                                | 23                   | 6.0                   | More majority-group members <sup>g</sup>           | 99                   | 91.7                  |
| <b>Publication years</b>                                |                      |                       | More minority-group members                        | 9                    | 8.3                   |
| Before 1999                                             | 78                   | 18.5                  | <b>TARGETERS OF AGEISM<sup>e</sup></b>             |                      |                       |
| Since 2000                                              | 344                  | 81.5                  | <b>Average age<sup>f</sup></b>                     |                      |                       |
| <b>Type of publications</b>                             |                      |                       | 18–30                                              | 14                   | 32.6                  |
| Peer-reviewed articles                                  | 386                  | 91.5                  | ≥ 30                                               | 29                   | 67.4                  |
| Grey literature                                         | 36                   | 8.5                   | <b>Gender</b>                                      |                      |                       |
| <b>Language</b>                                         |                      |                       | More men                                           | 21                   | 42.0                  |
| English                                                 | 419                  | 99.3                  | More women                                         | 29                   | 58.0                  |
| Others                                                  | 3                    | 0.7                   | <b>Education</b>                                   |                      |                       |
| <b>Type of studies</b>                                  |                      |                       | Majority attended high school or less <sup>g</sup> | 12                   | 26.7                  |
| Observational studies                                   | 288                  | 68.2                  | Majority attended college or more                  | 33                   | 73.3                  |
| Experimental studies                                    | 134                  | 31.8                  | <b>Race/Ethnicity</b>                              |                      |                       |
| <b>Ageism measures</b>                                  |                      |                       | More majority-group members <sup>g</sup>           | 9                    | 90.0                  |
| Perceived age discrimination                            | 261                  | 61.9                  | More minority-group members                        | 1                    | 10.0                  |
| Age stereotypes                                         | 97                   | 23.0                  |                                                    |                      |                       |
| Self-perceptions of aging                               | 64                   | 15.2                  |                                                    |                      |                       |
| <b>Study quality<sup>d</sup></b>                        |                      |                       |                                                    |                      |                       |
| Good quality                                            | 317                  | 75.1                  |                                                    |                      |                       |
| Medium to low quality                                   | 105                  | 24.9                  |                                                    |                      |                       |

<sup>a</sup> Numbers may not sum to total due to missing data, and percentages may not sum to 100% due to rounding. <sup>b</sup> Conducted in more than one continent. <sup>c</sup> Levels of development are categorized in accordance with the Dept. of Economics and Social Affairs, United Nations. <sup>d</sup> Good-quality studies are studies that were appraised with overall score of 7 and above based on our quality appraisal checklist. <sup>e</sup> The tabulations of targets and targeters' information are based on available data from studies that reported detailed study sample characteristics. <sup>f</sup> Average age uses either mean or median age of study samples, whichever reported. Targets' mean age may be less than 50 years old due to baseline age in longitudinal studies, or studies of older persons that had larger proportions of younger persons. <sup>g</sup> Majority is defined as more than 50% of participants in the study sample.
