# Supplementary material for: Global reach of ageism on older persons’ health: A systematic review
Source: PubMed Central journal article supplement (PMC6961830; doi:10.1371/journal.pone.0220857), 2020-01-15
Supplement: pone.0220857.s005.pdf [file pone.0220857.s005.pdf]

**S5. Sensitivity Analysis of Ageism Adversely Impacted Health Across Geography, Time, Study Characteristics, and Characteristics of Targets and Targeters in Good-Quality Studies** <sup>a, b</sup>

|                                                         | Significant Ageism Associations, % (n) <sup>b</sup> | Chi-square Values                 |                                                    | Significant Ageism Associations, % (n) <sup>b</sup> | Chi-square Values |
|---------------------------------------------------------|-----------------------------------------------------|-----------------------------------|----------------------------------------------------|-----------------------------------------------------|-------------------|
| <b>STUDY CHARACTERISTICS</b>                            |                                                     |                                   | <b>TARGETS OF AGEISM<sup>e</sup></b>               |                                                     |                   |
| <b>Continents of studies</b>                            |                                                     |                                   | <b>Average age<sup>f</sup></b>                     |                                                     |                   |
| Africa                                                  | 100.0 (1)                                           | 47.44***                          | < 74                                               | 69.7 (232)                                          | 4.81*             |
| Asia                                                    | 94.6 (53)                                           |                                   | ≥ 75                                               | 83.9 (47)                                           |                   |
| Australia/Oceania                                       | 96.9 (31)                                           |                                   | <b>Gender</b>                                      |                                                     |                   |
| Europe                                                  | 77.5 (182)                                          |                                   | More men                                           | 76.2 (263)                                          | 0.03              |
| North America                                           | 63.5 (339)                                          |                                   | More women                                         | 76.9 (173)                                          |                   |
| South America                                           | 100.0 (1)                                           |                                   | <b>Education</b>                                   |                                                     |                   |
| Global <sup>c</sup>                                     | 76.9 (50)                                           |                                   | Majority attended high school or less <sup>g</sup> | 89.3 (117)                                          | 15.10***          |
|                                                         |                                                     | Majority attended college or more | 67.5 (52)                                          |                                                     |                   |
| <b>Development level of study countries<sup>d</sup></b> |                                                     |                                   | <b>Race/Ethnicity</b>                              |                                                     |                   |
| More-developed countries                                | 70.1 (620)                                          | 7.38                              | More majority-group members <sup>g</sup>           | 70.9 (180)                                          | 0.01              |
| Less-developed countries                                | 90.0 (36)                                           |                                   | More minority-group members                        | 72.0 (18)                                           |                   |
| <b>Publication years</b>                                |                                                     |                                   | <b>TARGETERS OF AGEISM<sup>e</sup></b>             |                                                     |                   |
| Before 1999                                             | 53.3 (163)                                          | 69.08***                          | <b>Average age<sup>f</sup></b>                     |                                                     |                   |
| Since 2000                                              | 79.6 (493)                                          |                                   | 18–30                                              | 86.7 (13)                                           | 1.78              |
| <b>Type of publications</b>                             |                                                     |                                   | ≥ 30                                               | 69.7 (46)                                           |                   |
| Peer-reviewed articles                                  | 71.3 (617)                                          | 0.71                              | <b>Gender</b>                                      |                                                     |                   |
| Grey literature                                         | 66.1 (39)                                           |                                   | More men                                           | 68.4 (39)*                                          | 4.99*             |
| <b>Language</b>                                         |                                                     |                                   | More women                                         | 90.0 (27)                                           |                   |
| English                                                 | 70.7 (650)                                          | 0.83                              | <b>Education</b>                                   |                                                     |                   |
| Others                                                  | 100.0 (2)                                           |                                   | Majority attended high school or less <sup>g</sup> | 84.6 (11)                                           | 3.66              |
| <b>Type of studies</b>                                  |                                                     |                                   | Majority attended college or more                  | 55.8 (29)                                           |                   |
| Observational studies                                   | 71.3 (506)                                          | 0.18                              | <b>Race/Ethnicity</b>                              |                                                     |                   |
| Experimental studies                                    | 69.8 (150)                                          |                                   | More majority-group members <sup>g</sup>           | 67.7 (23)                                           | 0.47              |
| <b>Ageism measures</b>                                  |                                                     |                                   | More minority-group members                        | 100.0 (1)                                           |                   |
| Perceived ageism                                        | 64.0 (403)                                          | 48.74***                          |                                                    |                                                     |                   |
| Age stereotypes                                         | 82.5 (151)                                          |                                   |                                                    |                                                     |                   |
| Self-perceptions of aging                               | 91.1 (102)                                          |                                   |                                                    |                                                     |                   |

\*p<.05, \*\*p<.01, \*\*\*p<.001.

<sup>a</sup> Good-quality studies are studies that were appraised with overall score of 7 and above based on our quality appraisal checklists. The good-quality studies (n=317) included 925 associations in total. <sup>b</sup> Numbers may not sum to total due to missing data, and percentages may not sum to 100% due to rounding. <sup>c</sup> Conducted in more than one continent. <sup>d</sup> Levels of development are categorized in accordance with the Dept of Economic and Social Affairs, United Nations. <sup>e</sup> The tabulations of targets and targeters' information are based on available data from studies that reported detailed study sample characteristics. <sup>f</sup> Average age uses either mean or median age of study samples, whichever reported. Targets' average age may be less than 50 years old due to baseline age in longitudinal studies, or studies of older persons that had larger proportions of younger persons. <sup>g</sup> Majority is defined as more than 50% of participants in the study sample.
